# Supplementary material
Source: Royal Society of Chemistry journal article supplement (doi:10.1039/d6cp01151a)
Supplement: d6cp01151a1.pdf [file d6cp01151a1.pdf]

## SUPPORTING INFORMATION

### **Powdered Carboxymethyl Chitosan–Engineered nZVI Nanocomposites for Rapid and Ultrahigh-Capacity Cr(VI) Removal**

Ilma Amalina,<sup>a,b</sup> Muhammad Aditya Bryan Rahadi,<sup>b</sup> Tahta Amrillah,<sup>b,c</sup> Philip Drake,<sup>d</sup> Mochamad Lutfi Firmansyah<sup>a</sup> and Nisar Ullah<sup>\*a,e</sup>

<sup>a</sup>Interdisciplinary Research Centre for Refining and Advanced Chemicals, King Fahd University of Petroleum and Minerals, Dhahran 31261, Saudi Arabia

<sup>b</sup>Nanotechnology Engineering, Department of Engineering, Faculty of Advanced Technology and Multidiscipline, Universitas Airlangga, Surabaya 60115, Indonesia

<sup>c</sup>Airlangga Functional Nanomaterial Research Group, Faculty of Advanced Technology and Multidiscipline, Universitas Airlangga, Surabaya 60115, Indonesia

<sup>d</sup>Department of Chemistry and Biosciences, Faculty of Life Science, University of Bradford, Bradford BD7 1DP, United Kingdom

<sup>e</sup>Chemistry Department, King Fahd University of Petroleum and Minerals, Dhahran 31261, Saudi Arabia

#### **Corresponding Author**

*\*Nisar Ullah*

*King Fahd University of Petroleum and Minerals, Dhahran, 31261, Saudi Arabia*

*Tel: +96613 860 7527*

*E-mail: [nnullah@kfupm.edu.sa](mailto:nnullah@kfupm.edu.sa)*

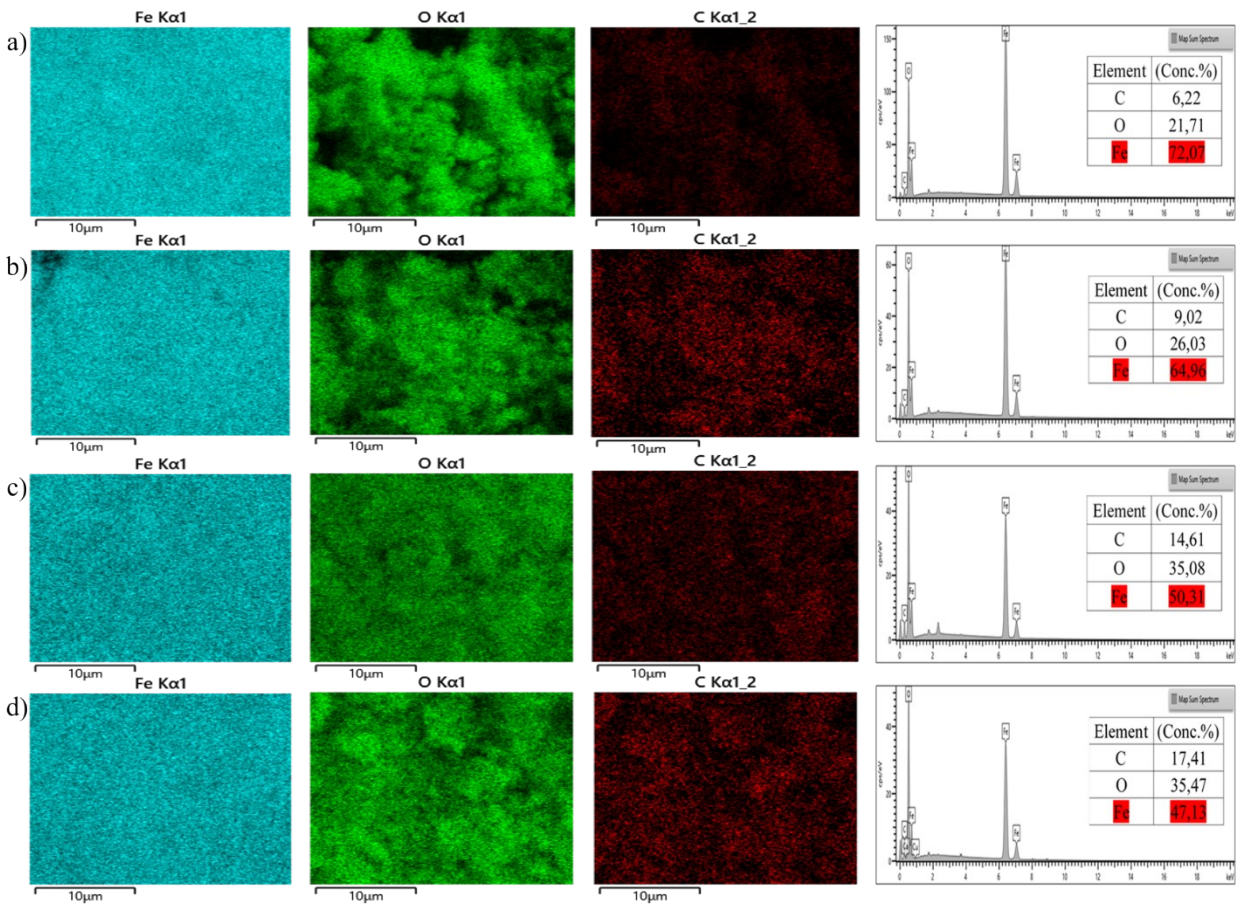

Figure S1. The EDX images of (a) nZVI (V1), (b) ChMC-nZVI 7.5% (V2), (c) ChMC-nZVI 15% (V3) and (d) ChMC-nZVI 30% (V4).

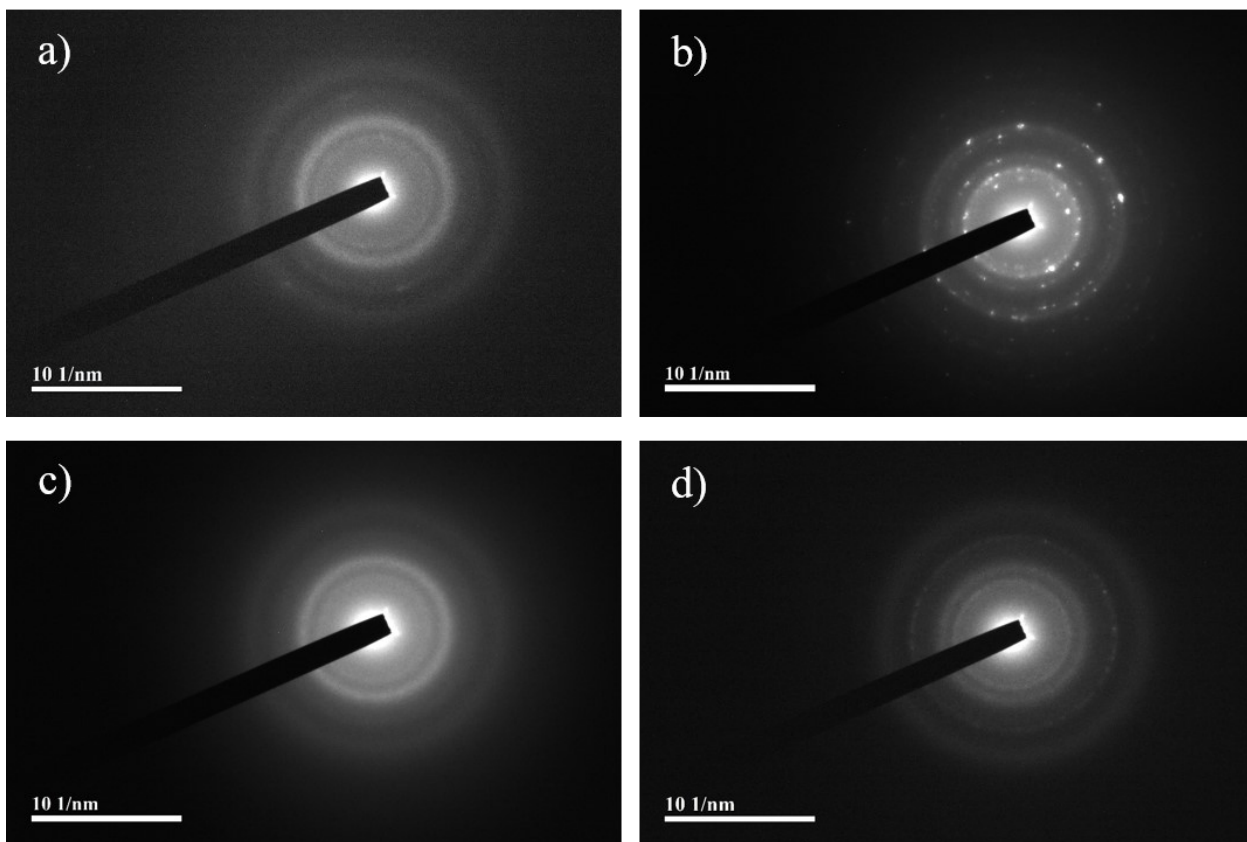

Figure S2. The selected area electron diffraction (SAED) pattern of (a) nZVI (V1), (b) ChMC-nZVI 7.5% (V2), (c) ChMC-nZVI 15% (V3) and (d) ChMC-nZVI 30% (V4).
